# Supplementary material
Source: HighWire-hosted journal article supplement (http://dmd.aspetjournals.org/highwire/filestream/66365/field_highwire_adjunct_files/0/Supplemental_Figure_1_55673.pdf)
Supplement: Supplemental_Figure_1_55673.pdf [file Supplemental_Figure_1_55673.pdf]

### Supplemental Fig. 1

Regulation of Human Cytosolic Sulfotransferases (SULTs) 1C2 and 1C3 by Nuclear Signaling Pathways in LS180 Colorectal Adenocarcinoma Cells

Elizabeth A. Rondini, Hailin Fang, Melissa Runge-Morris, and Thomas A. Kocarek

Drug Metabolism and Disposition

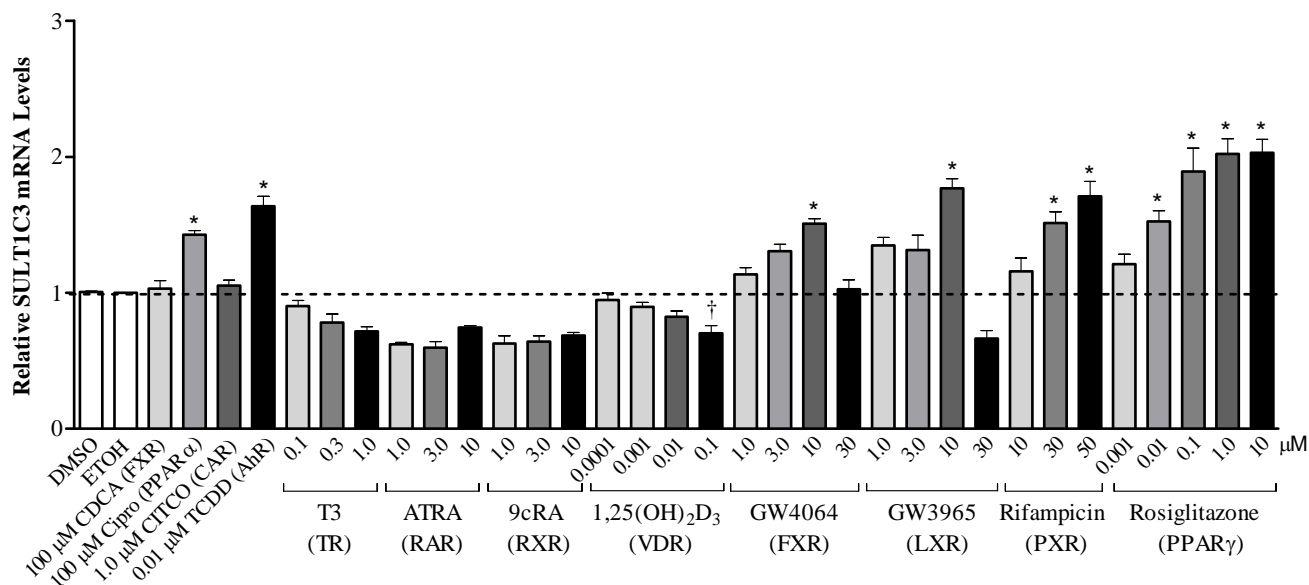

**Supplemental Fig. 1.** Effects of nuclear receptor activators on SULT1C3 mRNA levels in LS180 cells. LS180 cells were sub-cultured onto 12-well plates and 60 h later were treated with transcription factor activators at the indicated concentrations. DMSO (0.1%) and ethanol (0.1%) were used as vehicle controls. Medium containing the drug treatments was replaced once after 24 h. Forty-eight hours following the initial treatment, cells were harvested, and relative levels of SULT1C3 mRNA were quantified using qRT-PCR. The SULT1C3 TaqMan assay targeted exons 2-3. All assays were performed in duplicate. Bars represent mean  $\pm$  S.E.M. (n=6-24/treatment). \*Significantly different from DMSO-treated control (P<0.05); †significantly different from ethanol-treated control (P<0.05).
